# Supplementary material
Source: publisher figshare collection journal article supplement (https://gsajournals.figshare.com/ndownloader/files/21839067)
Supplement: Supplementary file 1 [file 21839067]

## Sheet: Sheet1
Table 4: Recombination Rates by Chromosome Estimated sex averaged recombination rates for each linkage group based on alignments to Arctic char, rainbow trout, and Atlantic salmon genomes. Estimates were derived by sampling 100 pairs of loci and regressing physical distance against genetic distance then taking the slope of the line of best fit. This process was repeated 100 times. Value reported …
Linkage Group	Arctic Char	Rainbow Trout	Atlantic Salmon
Sna1	0.848	0.891	0.594
Sna2	0.85	0.852	0.784
Sna3	0.734	0.802	0.532
Sna4	0.794	0.622	0.555
Sna5	1.029	0.945	1.01
Sna6	1.342	1.394	1.245
Sna7	1.146	1.138	1.002
Sna8	0.693	0.589	0.519
Sna9	0.383	0.417	0.367
Sna10	0.396	0.357	0.412
Sna11	0.507	0.461	0.426
Sna12	0.396	0.413	0.426
Sna13	0.522	0.569	0.518
Sna14	0.586	0.553	0.506
Sna15	0.539	0.586	0.524
Sna16	0.462	0.328	0.249
Sna17	1.165	0.833	0.727
Sna18	0.653	0.604	0.609
Sna19	0.556	0.454	0.451
Sna20	0.439	0.443	0.4
Sna21	0.32	0.363	0.315
Sna22	0.758	0.716	0.716
Sna23	0.657	0.777	0.603
Sna24	0.973	0.891	0.776
Sna25	0.512	0.669	0.524
Sna26	0.666	0.708	0.603
Sna27	0.581	0.544	0.506
Sna28	0.299	0.608	0.525
Sna29	0.645	0.667	0.623
Sna30	1.013	0.828	0.382
Sna31	0.468	0.543	0.49
Sna32	1.016	0.809	0.783
Sna33	0.82	0.851	0.281
Sna34	0.55	0.564	0.494
Sna35	0.768	0.629	0.709
Sna36	0.946	0.808	0.683
Sna37	0.954	0.719	0.745
Sna38	2.411	1.746	1.471
Sna39	2.935	1.389	1.27
Sna40	2.017	1.591	1.184
Sna41	0.138*	0.981	0.67
Sna42	NA	1.143	1.011
Mean	0.817	0.757	0.648
Minimum	0.138	0.328	0.249
Maximum	2.935	1.746	1.471
